# Supplementary material
Source: HighWire-hosted journal article supplement (https://bmjopen.bmj.com/content/8/12/e020757)
Supplement: inline-supplementary-material-2 [file inline-supplementary-material-2.pdf]

Appendix B: Table of eligible on-going studies

| <b>Title</b>                                                                                                                                                                                                                                                                           | <b>ID</b>   | <b>Comparison</b>                                               | <b>Status</b>               | <b>Design</b>                    | <b>Contact</b> | <b>Country</b> |
|----------------------------------------------------------------------------------------------------------------------------------------------------------------------------------------------------------------------------------------------------------------------------------------|-------------|-----------------------------------------------------------------|-----------------------------|----------------------------------|----------------|----------------|
| <b>ClinicalTrials.gov</b>                                                                                                                                                                                                                                                              |             |                                                                 |                             |                                  |                |                |
| Comparison of Combined Lumbar and Sacral Plexus Block With Sedation Versus General Endotracheal Anesthesia on Postoperative Outcomes in Elderly Patients Undergoing Hip Fracture Surgery(CLSB-HIPELD): Rationale and Design of a Prospective, Multicenter, Randomized Controlled Trial | NCT03318133 | General vs Combined lumbar plexus and sacral plexus block(CLSB) | Not yet recruiting patients | Double blind randomised trial    | Xiaofeng Wang  | China          |
| The Comparative Effects of Regional or General Anesthesia on the Prognosis of Hip                                                                                                                                                                                                      | NCT03116490 | General vs Regional                                             | Recruiting patients         | Prospective observational cohort | Ting Li        | China          |

|                                                                                                      |             |                                                                |                                                |                                          |                                    |          |
|------------------------------------------------------------------------------------------------------|-------------|----------------------------------------------------------------|------------------------------------------------|------------------------------------------|------------------------------------|----------|
| Fracture Surgery on Elderly Patients                                                                 |             |                                                                |                                                |                                          |                                    |          |
| Variations in Anaesthesia care for hip fracture surgery                                              | NCT02787031 | General vs Neuraxial                                           | Recruitment completed but no results available | Retrospective observational cohort       | Ottawa Hospital Research Institute | Canada   |
| Regional versus general anaesthesia for promoting independence after hip fracture                    | NCT02507505 | General vs Regional                                            | Recruiting patients                            | Double blind randomised trial            | Mark Powell/<br>Mark Neuman        | USA      |
| Effect of anaesthesia on post-operative delirium in elderly patients undergoing hip fracture surgery | NCT02213380 | General vs Regional                                            | Recruiting patients                            | Open label randomised controlled trial   | Ting Li/ Sishi Chen                | China    |
| The safety of anaesthesia management for traumatic hip surgery in elderly                            | NCT02692989 | General vs Regional                                            | Ongoing, but not recruiting patients           | Retrospective observational cohort       | Subhi M Alghanem                   | Jordan   |
| Anaesthesia and post-operative mortality after proximal femur fractures                              | NCT02406300 | Peripheral nerve block/<br>General vs Subarachnoid anaesthesia | Enrolling patients by invite only              | Double blind randomised controlled trial | Raul Carvalho                      | Portugal |

|                                                                                                                                                                                       |                     |                                      |                          |                                    |               |                |
|---------------------------------------------------------------------------------------------------------------------------------------------------------------------------------------|---------------------|--------------------------------------|--------------------------|------------------------------------|---------------|----------------|
| Effect of anaesthesia in fracture healing                                                                                                                                             | NCT02621255         | General vs Regional                  | Recruiting patients      | Double blind randomised trial      | Ebru Biricik  | Turkey         |
| Mortality following surgery for proximal femoral fractures                                                                                                                            | NCT01807039         | General vs. Subarachnoid anaesthesia | Study has been completed | Retrospective observational cohort | Petr Štourač  | Czech Republic |
| <b>ICTRP</b>                                                                                                                                                                          |                     |                                      |                          |                                    |               |                |
| Hypobaric Lateral Spinal Anesthesia Versus General Anesthesia: Hemodynamic Stability and Short Term Cardiovascular Complications in Elderly Patients Undergoing Hip Fracture Surgery. | NCTNCT03373864      | General vs Hypobaric lateral spinal  | Recruiting patients      | Randomised controlled trial        | Claire Delsuc | France         |
| Effects of different anesthesia methods on postoperative complications and hospital mortality in elderly patients                                                                     | ChiCTR-RRC-17013545 | General vs Regional                  | Recruiting patients      | Prospective cohort                 | Xu Mao        | China          |

|                                                                                                                                              |                    |                     |                     |                               |                   |      |
|----------------------------------------------------------------------------------------------------------------------------------------------|--------------------|---------------------|---------------------|-------------------------------|-------------------|------|
| with hip fracture                                                                                                                            |                    |                     |                     |                               |                   |      |
| Hemodynamic effects of general and spinal anaesthesia for hip fracture surgery                                                               | IRCT201308316280N4 | General vs Spinal   | Completed           | Double blind randomised trial | Mohammad Haghighi | Iran |
| <b>ISRCTN</b>                                                                                                                                |                    |                     |                     |                               |                   |      |
| A Feasibility Randomised Controlled Trial to compare REgional versus General Anaesthesia in Reducing Delirium in patients with Hip Fractures | ISRCTN15165914     | General vs Regional | Recruiting patients | Randomised controlled trial   | Joyce Yeung       | UK   |
